# Supplementary figures and images for: RNA-binding proteins distinguish between similar sequence motifs to promote targeted deadenylation by Ccr4-Not
Source: eLife journal article supplement (doi:10.7554/elife.40670), 2019-01-02

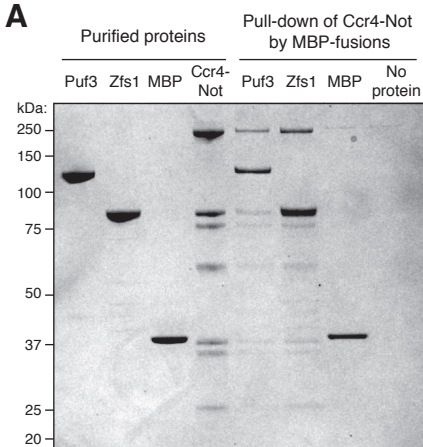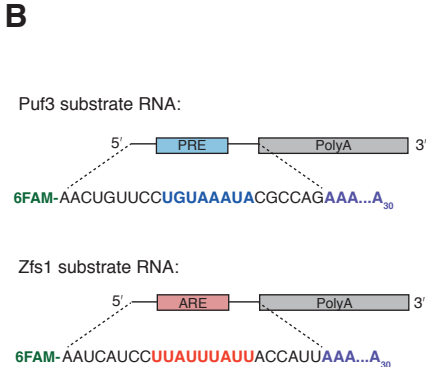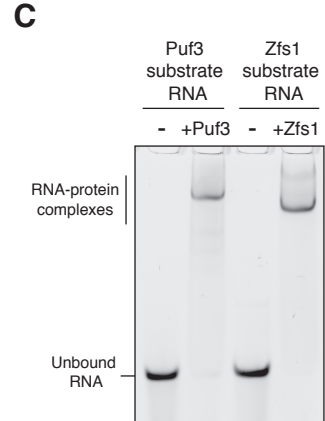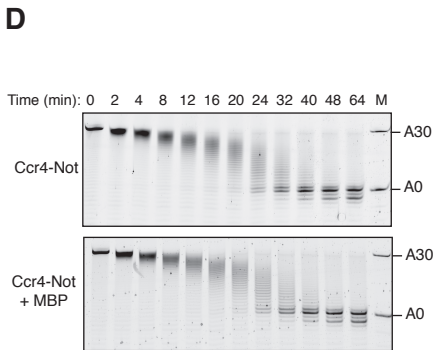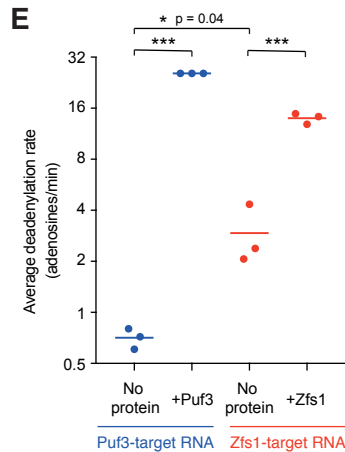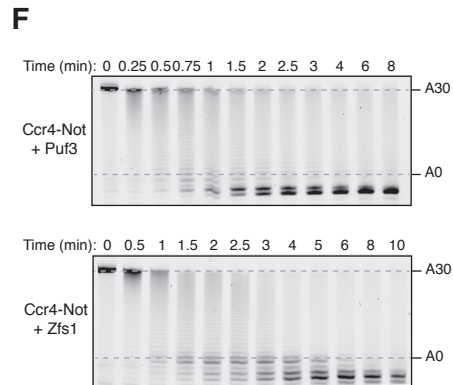

Supplement: supp [file elife-40670-supp-v1.zip]

**A**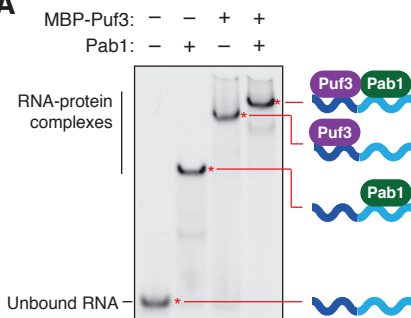**B**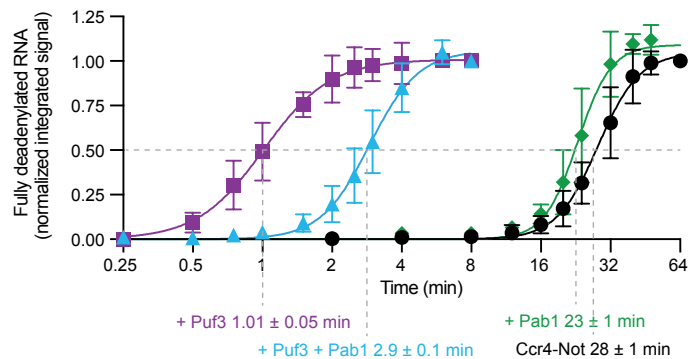**C**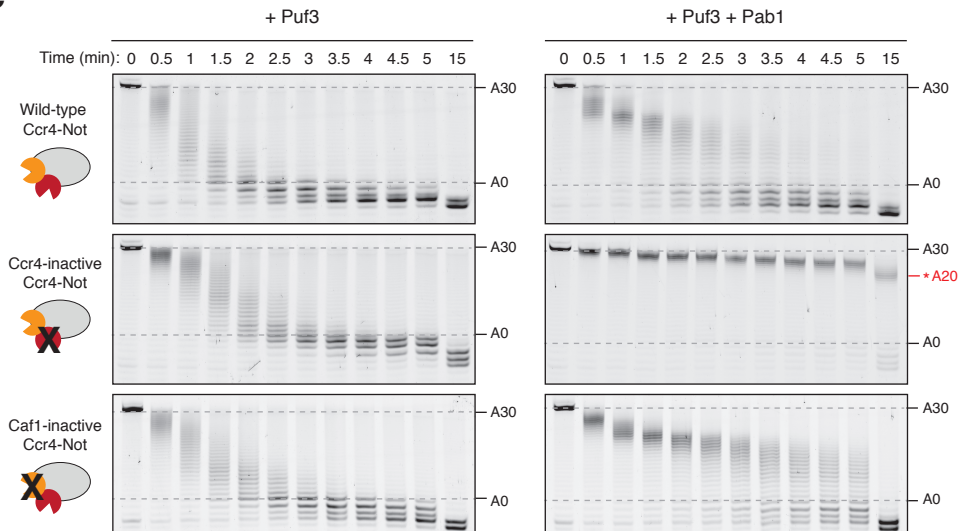

Supplement: supp [file elife-40670-supp-v1.zip]

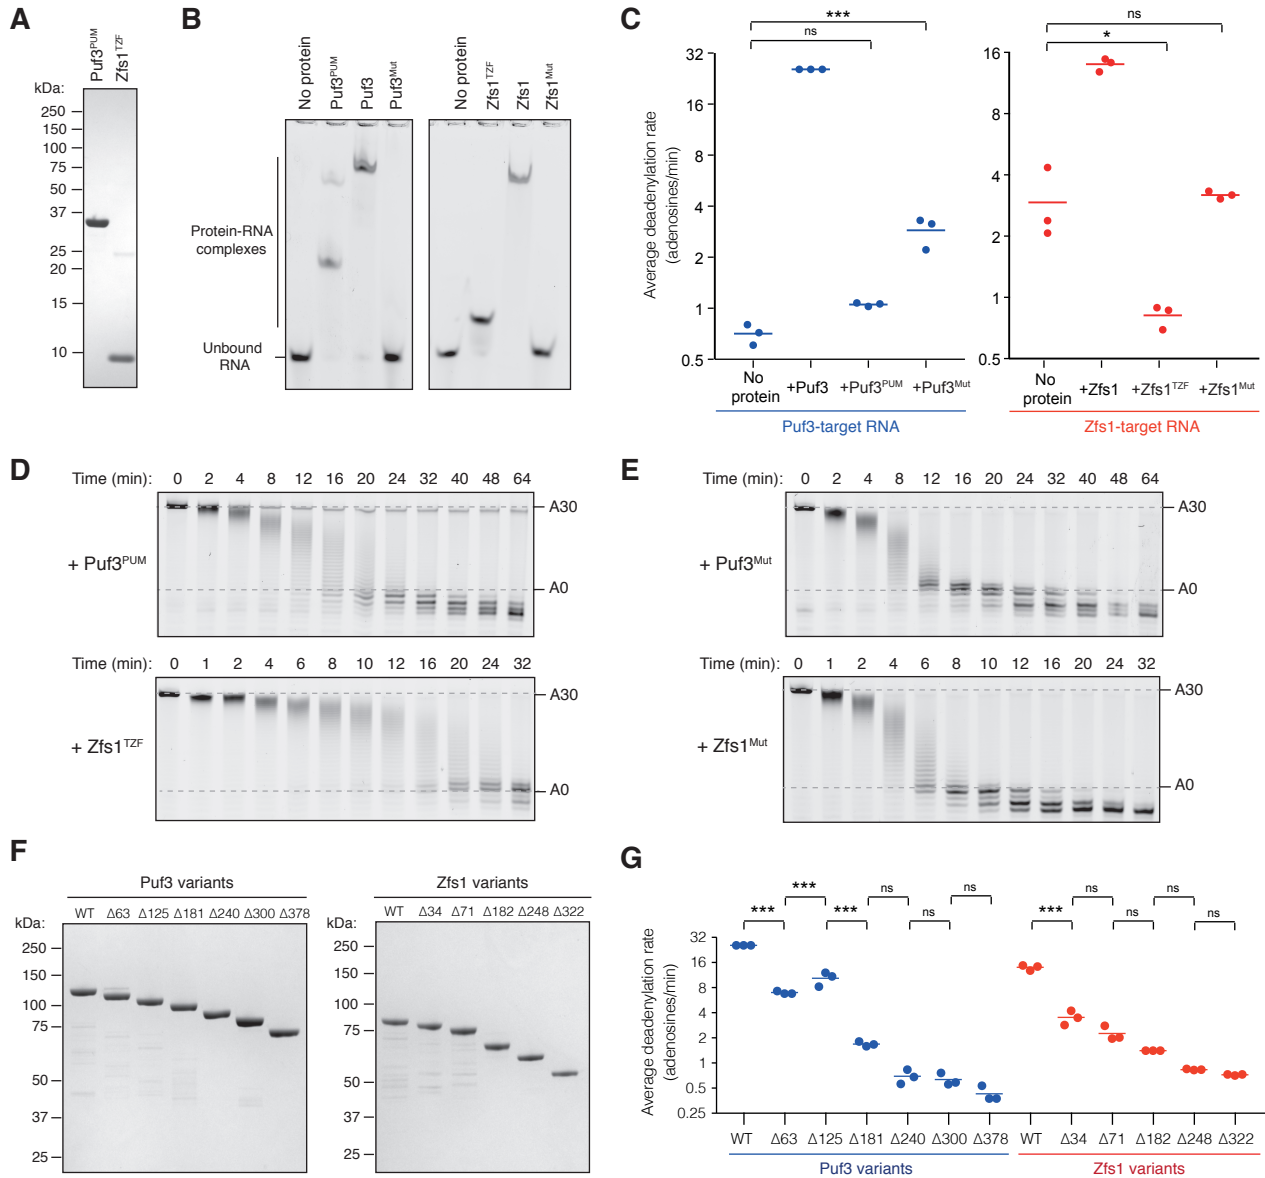

Supplement: supp [file elife-40670-supp-v1.zip]

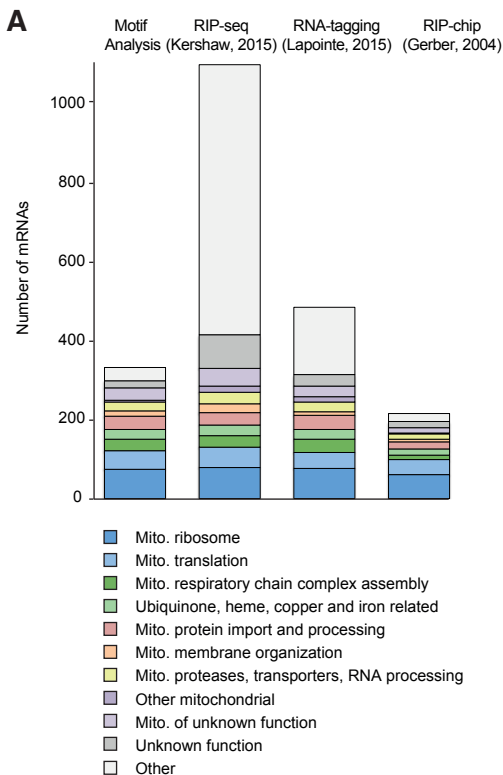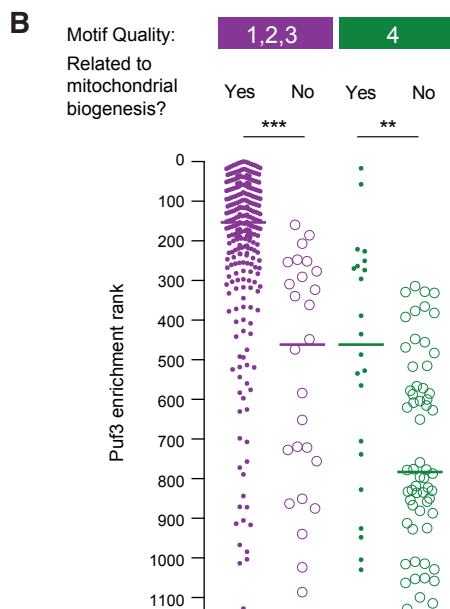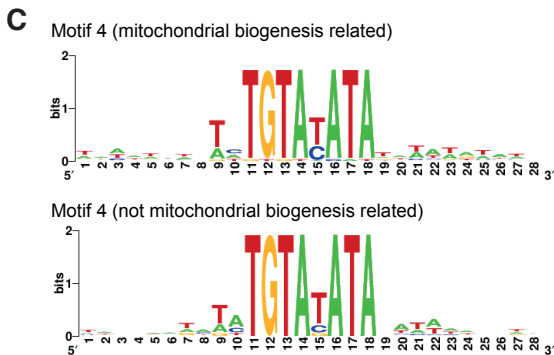

Supplement: supp [file elife-40670-supp-v1.zip]

**A**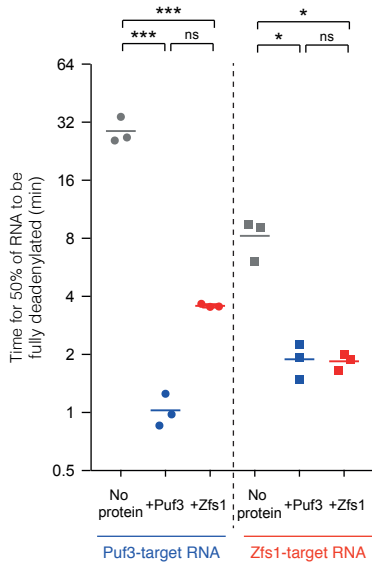**B**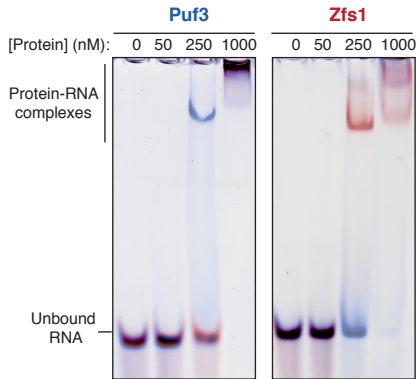

Supplement: supp [file elife-40670-supp-v1.zip]
